# Supplementary material for: From micrograms to picograms: quantitative PCR reduces the material demands of high-throughput sequencing
Source: PubMed Central journal article supplement — Nucleic Acids Res. 2007 Dec 15;36(1):e5. doi: 10.1093/nar/gkm1095 (PMC2248761; doi:10.1093/nar/gkm1095), 2007-12-15
Supplement: nar_gkm1095_1.pdf [file nar_gkm1095_1.pdf]

**Supplementary Table.** Filtered sequence information from the 454 run-processing software

| library ID     | copies-per-bead | raw wells | libraries (key = TCAG) |            |               |              |     |                     |        | control beads (key = ATGC) |               |              |      |        |                     |     |
|----------------|-----------------|-----------|------------------------|------------|---------------|--------------|-----|---------------------|--------|----------------------------|---------------|--------------|------|--------|---------------------|-----|
|                |                 |           | keypass wells          | failed [%] |               |              |     | passed filter wells |        | keypass wells              | failed [%]    |              |      |        | passed filter wells |     |
|                |                 |           | dot                    | mixed      | short quality | short primer | [%] | number              | dot    | mixed                      | short quality | short primer | [%]  | number |                     |     |
| Neanderthal 1  | 2.17            | 33,490    | 32,196                 | 18.2       | 8.7           | 21.1         | 0.0 | 51.9                | 16,723 | 569                        | 1.2           | 6.3          | 10.5 | 0.0    | 81.9                | 466 |
| Neanderthal 2  | 2.25            | 33,835    | 32,549                 | 14.0       | 9.5           | 15.6         | 0.0 | 60.8                | 19,797 | 533                        | 0.4           | 6.0          | 10.1 | 0.0    | 83.5                | 445 |
| Neanderthal 3  | 2.08            | 31,269    | 30,494                 | 16.1       | 8.2           | 15.8         | 0.0 | 60.0                | 18,282 | 411                        | 0.2           | 6.8          | 13.6 | 0.0    | 79.3                | 326 |
| Neanderthal 4  | 2.17            | 33,002    | 31,983                 | 15.5       | 9.2           | 14.5         | 0.0 | 60.8                | 19,461 | 542                        | 0.4           | 6.6          | 10.5 | 0.0    | 82.5                | 447 |
| Neanderthal 5  | 2.19            | 33,856    | 32,911                 | 14.6       | 9.4           | 16.1         | 0.0 | 59.9                | 19,717 | 479                        | 0.4           | 5.4          | 7.5  | 0.0    | 86.6                | 415 |
| Neanderthal 6  | 2.16            | 26,831    | 25,632                 | 12.1       | 11.3          | 11.6         | 0.0 | 65.1                | 16,679 | 350                        | 0.3           | 3.7          | 12.6 | 0.0    | 83.4                | 292 |
| Neanderthal 7  | 2.14            | 38,954    | 37,865                 | 13.2       | 10.8          | 14.4         | 0.0 | 61.6                | 23,315 | 400                        | 1.5           | 5.0          | 18.0 | 0.0    | 75.5                | 302 |
| Neanderthal 8  | 2.20            | 27,940    | 27,080                 | 15.3       | 9.5           | 14.9         | 0.0 | 60.2                | 16,294 | 358                        | 1.4           | 4.7          | 12.3 | 0.0    | 81.6                | 292 |
| Neanderthal 9  | 2.15            | 31,543    | 30,679                 | 16.2       | 11.5          | 13.6         | 0.0 | 58.7                | 17,999 | 383                        | 1.6           | 6.8          | 10.4 | 0.0    | 81.2                | 311 |
| Neanderthal 10 | 1.59            | 29,744    | 28,935                 | 12.0       | 7.8           | 10.6         | 0.0 | 69.7                | 20,154 | 444                        | 0.5           | 5.2          | 12.2 | 0.0    | 82.2                | 365 |
| Neanderthal 11 | 2.33            | 34,640    | 33,878                 | 17.1       | 8.9           | 17.7         | 0.0 | 56.3                | 19,071 | 359                        | 0.3           | 6.1          | 7.8  | 0.0    | 85.8                | 308 |
| Neanderthal 12 | 2.25            | 31,663    | 30,665                 | 12.4       | 9.2           | 14.0         | 0.0 | 64.4                | 19,754 | 449                        | 0.4           | 4.5          | 12.5 | 0.0    | 82.6                | 371 |
| SAGE ditags    | 1.64            | 37,142    | 35,782                 | 5.6        | 3.4           | 31.0         | 0.2 | 59.9                | 21,429 | 512                        | 0.6           | 5.7          | 43.0 | 0.0    | 50.8                | 260 |
| Amplicons      | 1.35            | 38,234    | 37,748                 | 7.0        | 11.2          | 26.8         | 0.2 | 54.9                | 20,716 | 212                        | 0.0           | 11.3         | 43.9 | 0.0    | 44.8                | 95  |
| Bonobo         | 2.33            | 33,431    | 32,421                 | 5.4        | 20.3          | 36.4         | 0.2 | 37.7                | 12,232 | 403                        | 0.5           | 4.5          | 39.2 | 0.0    | 55.8                | 225 |
